# Supplementary material for: Two extended haplotype blocks are associated with adaptation to high altitude habitats in East African honey bees
Source: PLoS Genet. 2017 May 25;13(5):e1006792. doi: 10.1371/journal.pgen.1006792 (PMC5444601; doi:10.1371/journal.pgen.1006792)
Supplement: S2 Table — (XLSX) [file pgen.1006792.s011.xlsx]

## Sheet: S2A Table
S2A Table. Unplaced scaffolds with outlier SNPs (FST>0.5)
Region	Scaffold / Contig	Length (bp)	SNPs FST>0.5 (n)
r7	GroupUn1403	3611	129
r7	GroupUn5216	4674	128
r7	GroupUn4219	2919	89
r7	GroupUn1982	2987	88
r7	GroupUn2621	1696	55
r7	GroupUn4636	1015	44
r7	GroupUn5296	1020	35
r7	GroupUn2511	989	31
r7	GroupUn5307	909	27
r7	GroupUn1661	1189	18
r7	GroupUn4978	1829	14
r7	GroupUn3192	979	9
r7	GroupUn2165	1088	7
r7	GroupUn528	1122	5
r7	GroupUn3362	1147	2
r7	GroupUn3789	1420	1
	Σ	28594	682
r9	GroupUn4042	23573	113
r9	GroupUn1837	11876	45
r9	GroupUn3787	5325	31
r9	GroupUn2851	4812	25
r9	GroupUn3865	2546	22
r9	GroupUn753	1191	11
r9	GroupUn1116	1058	10
r9	GroupUn4436	2001	10
r9	GroupUn2277	1530	9
r9	GroupUn3306	4624	8
r9	GroupUn804	940	6
r9	GroupUn4917	988	6
r9	GroupUn3193	961	2
r9	GroupUn4570	1049	1
	Σ	62474	299
?	GroupUn869	3864	1

## Sheet: S2B Table
S2B Table. Delly read pair analaysis and assement that links unplaced scaffolds to chromosome.
Scaffold	Start	Stop	Alternative	Source (bp)	Target (bp)	Chromosome	Scaffold	Start	Stop	Closest gap	Distance to gap	Genotypes
												0/0 (n)	0/1 (n)	1/1 (n)	??
GroupUn2165	132586473	132587560	1	132587532	4794	Group7	7.1	1	154458	1	4793	3	0	2	34
GroupUn2165	132586473	132587560	2	132587357	5006	Group7	7.1	1	154458	1	5005	29	6	2	2
GroupUn5307	295739272	295740180	1	295739406	106146	Group7	7.1	1	154458	154459	48313	19	1	0	19
GroupUn5307	295739272	295740180	2	295739278	106401	Group7	7.1	1	154458	154459	48058	0	0	8	31
GroupUn1661	106537922	106539110	1	106538944	147269	Group7	7.1	1	154458	154459	7190	4	9	6	20
GroupUn1661	106537922	106539110	2	106538722	147457	Group7	7.1	1	154458	154459	7002	22	4	0	13
GroupUn5216	291026989	291031662	1	291027038	220118	Group7	7.2	204459	379065	204458	15660	7	0	6	26
GroupUn3192	185858226	185859204	1	185858272	237982	Group7	7.2	204459	379065	204458	33524	0	0	10	29
GroupUn4219	239224357	239227275	1	239227136	249084	Group7	7.2	204459	379065	204458	44626	37	2	0	0
GroupUn4219	239224357	239227275	2	239224395	251230	Group7	7.2	204459	379065	204458	46772	0	1	6	32
GroupUn4219	239224357	239227275	3	239224892	251398	Group7	7.2	204459	379065	204458	46940	25	7	2	5
GroupUn3362	194667434	194668580	1	194668502	255194	Group7	7.2	204459	379065	204458	50736	6	3	17	13
GroupUn3362	194667434	194668580	2	194667454	255514	Group7	7.2	204459	379065	204458	51056	0	3	18	18
GroupUn2621	156219423	156221118	1	156219424	272435	Group7	7.2	204459	379065	204458	67977	0	1	18	20
GroupUn2621	156219423	156221118	2	156221097	273943	Group7	7.2	204459	379065	204458	69485	0	0	39	0
GroupUn3789	216796797	216798216	1	216796899	331009	Group7	7.2	204459	379065	379066	48057	2	5	15	17
GroupUn3789	216796797	216798216	2	216797004	331015	Group7	7.2	204459	379065	379066	48051	3	26	10	0
GroupUn528	47531561	47532549	1	47531804	434083	Group7	7.3	429066	664212	429065	5018	34	1	0	4
GroupUn528	47531561	47532549	2	47532319	434303	Group7	7.3	429066	664212	429065	5238	24	1	1	13
GroupUn2165	132586473	132587560	3	132587531	438110	Group7	7.3	429066	664212	429065	9045	3	0	4	32
GroupUn2165	132586473	132587560	4	132586700	438960	Group7	7.3	429066	664212	429065	9895	30	0	0	9
GroupUn5216	291026989	291031662	2	291027879	441681	Group7	7.3	429066	664212	429065	12616	35	3	0	1
GroupUn1403	93121642	93125252	1	93122247	517141	Group7	7.3	429066	664212	429065	88076	35	1	0	3
GroupUn1403	93121642	93125252	2	93121721	517266	Group7	7.3	429066	664212	429065	88201	1	0	17	21
GroupUn1403	93121642	93125252	3	93123180	518357	Group7	7.3	429066	664212	429065	89292	33	1	1	4
GroupUn4636	260923150	260924164	1	260924012	547484	Group7	7.3	429066	664212	664212	116728	33	2	1	3
GroupUn4636	260923150	260924164	2	260924163	547665	Group7	7.3	429066	664212	664212	116547	1	1	15	22
GroupUn4636	260923150	260924164	3	260923150	548147	Group7	7.3	429066	664212	664212	116065	0	0	15	24
GroupUn2511	150528382	150529370	1	150529005	557714	Group7	7.3	429066	664212	664212	106498	38	1	0	0
GroupUn5296	295178506	295179525	1	295179185	581970	Group7	7.3	429066	664212	664212	82242	23	7	2	7
GroupUn5296	295178506	295179525	2	295178791	582186	Group7	7.3	429066	664212	664212	82026	32	3	1	3
GroupUn5296	295178506	295179525	3	295179379	583873	Group7	7.3	429066	664212	664212	80339	3	0	11	25
GroupUn1982	123088693	123091679	1	123091509	632767	Group7	7.3	429066	664212	664212	31445	13	4	3	19
GroupUn1982	123088693	123091679	2	123090842	632892	Group7	7.3	429066	664212	664212	31320	15	9	0	15
GroupUn1982	123088693	123091679	3	123088772	635744	Group7	7.3	429066	664212	664212	28468	9	0	1	29
GroupUn5216	291026989	291031662	3	291030935	1529003	Group7	7.5	768828	1533220	1533221	4218	34	2	0	3
GroupUn5216	291026989	291031662	4	291029654	1530069	Group7	7.5	768828	1533220	1533221	3152	9	8	2	20
GroupUn5216	291026989	291031662	6	291028427	1531643	Group7	7.5	768828	1533220	1533221	1578	35	2	1	1
GroupUn5216	291026989	291031662	7	291028111	1532020	Group7	7.5	768828	1533220	1533221	1201	36	3	0	0
GroupUn528	47531561	47532549	3	47532217	2698691	Group7	7.9	2372274	3043098	2372273	326418	6	1	7	25
GroupUn3362	194667434	194668580	3	194668003	12273248	Group7	7.24	11945897	13219345	11945896	327352	32	0	1	6
GroupUn4436	250517022	250519022	1	250517247	1234596	Group9	9.4	1219055	1673225	1219054	15542	9	1	1	28
GroupUn4436	250517022	250519022	2	250517835	1738229	Group9	9.5	1723226	2327780	1723225	15004	1	6	9	23
GroupUn4436	250517022	250519022	3	250517605	1738261	Group9	9.5	1723226	2327780	1723225	15036	16	6	1	16
GroupUn4436	250517022	250519022	4	250518463	1739128	Group9	9.5	1723226	2327780	1723225	15903	31	5	0	3
GroupUn4436	250517022	250519022	5	250518624	1739758	Group9	9.5	1723226	2327780	1723225	16533	38	1	0	0
GroupUn804	61879147	61880086	1	61880000	1811306	Group9	9.5	1723226	2327780	1723225	88081	0	3	27	9
GroupUn753	59239726	59240916	1	59240866	1950904	Group9	9.5	1723226	2327780	1723225	227679	0	0	36	3
GroupUn753	59239726	59240916	2	59239745	1950993	Group9	9.5	1723226	2327780	1723225	227768	0	0	39	0
GroupUn3306	191775344	191779967	1	191778261	2136140	Group9	9.5	1723226	2327780	2327781	191641	29	1	0	9
GroupUn3306	191775344	191779967	2	191776938	2137526	Group9	9.5	1723226	2327780	2327781	190255	34	4	0	1
GroupUn3306	191775344	191779967	3	191776003	2138203	Group9	9.5	1723226	2327780	2327781	189578	7	3	10	19
GroupUn3306	191775344	191779967	4	191776416	2138858	Group9	9.5	1723226	2327780	2327781	188923	36	2	0	1
GroupUn2277	138387124	138388653	2	138387655	2205345	Group9	9.5	1723226	2327780	2327781	122436	9	2	0	28
GroupUn753	59239726	59240916	3	59240872	2377820	Group9	9.6	2377781	2379273	2377780	40	0	3	32	4
GroupUn4042	230029335	230052907	1	230051062	2629291	Group9	9.7	2429274	3472693	2429273	200018	5	34	0	0
GroupUn4042	230029335	230052907	3	230029335	2629883	Group9	9.7	2429274	3472693	2429273	200610	0	3	32	4
GroupUn4042	230029335	230052907	4	230052798	2631165	Group9	9.7	2429274	3472693	2429273	201892	14	3	7	15
GroupUn1837	115606840	115618715	1	115607026	2766086	Group9	9.7	2429274	3472693	2429273	336813	16	7	2	14
GroupUn1837	115606840	115618715	2	115610709	2769778	Group9	9.7	2429274	3472693	2429273	340505	7	6	25	1
GroupUn1837	115606840	115618715	3	115611239	2770256	Group9	9.7	2429274	3472693	2429273	340983	27	5	2	5
GroupUn1837	115606840	115618715	4	115611580	2770492	Group9	9.7	2429274	3472693	2429273	341219	13	3	0	23
GroupUn1837	115606840	115618715	5	115613462	2772551	Group9	9.7	2429274	3472693	2429273	343278	14	22	0	3
GroupUn1837	115606840	115618715	6	115613631	2773030	Group9	9.7	2429274	3472693	2429273	343757	32	2	0	5
GroupUn1837	115606840	115618715	7	115614404	2773117	Group9	9.7	2429274	3472693	2429273	343844	38	1	0	0
GroupUn1837	115606840	115618715	8	115615355	2774769	Group9	9.7	2429274	3472693	2429273	345496	12	13	12	2
GroupUn1837	115606840	115618715	9	115615966	2774904	Group9	9.7	2429274	3472693	2429273	345631	26	5	1	7
GroupUn3787	216690068	216695392	1	216690234	2802008	Group9	9.7	2429274	3472693	2429273	372735	35	2	0	2
GroupUn3787	216690068	216695392	2	216693503	2804394	Group9	9.7	2429274	3472693	2429273	375121	28	7	1	3
GroupUn3787	216690068	216695392	3	216693045	2804927	Group9	9.7	2429274	3472693	2429273	375654	28	1	0	10
GroupUn4570	257506007	257507055	1	257506763	2827003	Group9	9.7	2429274	3472693	2429273	397730	16	1	1	21
GroupUn4917	275456849	275457836	1	275457501	2914054	Group9	9.7	2429274	3472693	2429273	484781	37	1	0	1
GroupUn2851	168096524	168101335	1	168096618	2949542	Group9	9.7	2429274	3472693	2429273	520269	9	5	4	21
GroupUn2851	168096524	168101335	3	168099447	2952497	Group9	9.7	2429274	3472693	3472694	520197	22	17	0	0
GroupUn2851	168096524	168101335	4	168100567	2953518	Group9	9.7	2429274	3472693	3472694	519176	29	3	0	7
GroupUn1116	78110017	78111074	1	78110106	3418462	Group9	9.7	2429274	3472693	3472694	54232	3	1	8	27
GroupUn1116	78110017	78111074	2	78110256	3418579	Group9	9.7	2429274	3472693	3472694	54115	33	1	1	4
GroupUn1116	78110017	78111074	3	78111013	3419256	Group9	9.7	2429274	3472693	3472694	53438	2	0	1	36
GroupUn3865	220779636	220782181	1	220779706	3429720	Group9	9.7	2429274	3472693	3472694	42974	4	10	13	12
GroupUn3865	220779636	220782181	2	220781025	3430971	Group9	9.7	2429274	3472693	3472694	41723	4	16	19	0
GroupUn3865	220779636	220782181	3	220781258	3431324	Group9	9.7	2429274	3472693	3472694	41370	33	1	0	5
